# Supplementary material
Source: ML conference proceedings conference paper supplement (https://openaccess.thecvf.com/content/CVPR2025/html/Sharifdeen_O-TPT_Orthogonality_Constraints_CVPR_2025_paper.html)
Supplement: Supplementary file 1 [file Sharifdeen_O-TPT_Orthogonality_Constraints_CVPR_2025_supplemental.pdf]

# O-TPT: Orthogonality Constraints for Calibrating Test-time Prompt Tuning in Vision-Language Models

## Supplementary Material

In this supplementary material, we provide the following:

1. We reveal the relation between calibration performance and angular distances (sec. A1)
2. We compare the SCE performance (sec. A2)
3. Reliability plots comparison with C-TPT [5]. (sec. A3)
4. Calibration performance with different hard prompt styles (sec. A4)
5. Calibration with a Combination of C-TPT and O-TPT (sec. A5)
6. O-TPT results on Medical Prompt tuning methods (sec. A6)
7. Pareto Front analysis with varying  $\lambda$  (sec. A7)

### A1. Relation Between Calibration Performance and Angular Distances

To further validate our motivation, we conduct an experiment using 80 different hard prompt styles [4] to evaluate their corresponding Expected Calibration Error (ECE) performance and the mean cosine similarity of text features. This evaluation is performed on zero-shot inference using the CLIP-B/16 backbone. Figure 1 illustrates the results for prompts that yield higher accuracies across seven diverse datasets: Flower, Caltech101, SUN397, Cars, Pets, UCF101, and Food101. Specifically, we focus on the top 10 prompt styles that provide the highest accuracies.

The results reveal a clear trend between mean cosine similarity (an angular distance measure) and ECE (calibration performance). A lower mean cosine similarity correlates with a reduced ECE, indicating that greater angular distancing among text features promotes better calibration. This suggests that prompts with text features exhibiting greater angular distances between their representations lead to improved calibration outcomes.

### A2. SCE performance comparison

Tables 1 and 2 present the Static Calibration Error (SCE) results across 10 datasets using CLIP-B/16 and CLIP RN-50 backbones. Our method, O-TPT, outperforms C-TPT on both backbones, achieving an overall average SCE values of **1.07** for CLIP-B/16 and **1.24** for CLIP RN-50, demonstrating improved calibration performance.

### A3. Reliability Plots

Figure 2 and Figure 3 illustrate the reliability diagrams for the CLIP-B/16 and CLIP RN-50 backbones, respectively,

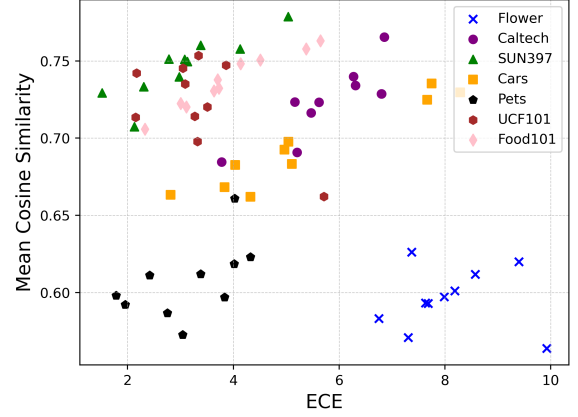

Figure 1. Relation of ECE with cosine similarities (of textual features) on CLIP-B/16 backbone.

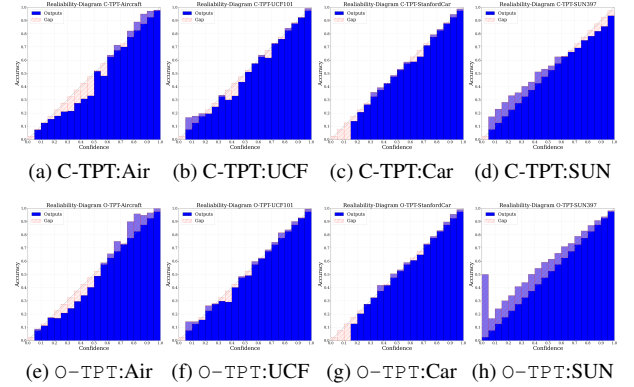

Figure 2. Reliability diagrams for CLIP-B/16.

comparing the performance of C-TPT and O-TPT across the Aircraft, UCF101, Car, and SUN397 datasets. For the CLIP-B/16 backbone (Fig. 2), O-TPT effectively addresses the overconfidence problem and outperforms C-TPT, as evident from the reliability diagrams in the top and bottom rows of Fig. 2. Similarly, with CLIP RN-50 backbone, (Fig. 3) shows that O-TPT provides significantly better calibration compared to C-TPT, particularly in addressing overconfident predictions.

### A4. Calibration with different prompts

This section presents the results of O-TPT initialized with different prompts, such as ‘a photo of the cool {class}’ and

| Method       | Metric | DTD  | FLW  | Food | SUN  | Air  | Pets | Calt | UCF  | SAT  | Car  | Avg         |
|--------------|--------|------|------|------|------|------|------|------|------|------|------|-------------|
| Zero Shot    | SCE    | 1.33 | 0.59 | 0.20 | 0.12 | 0.52 | 0.68 | 0.25 | 0.52 | 6.18 | 0.23 | 1.06        |
| TPT          | SCE    | 1.44 | 0.51 | 0.17 | 0.15 | 0.58 | 0.60 | 0.16 | 0.57 | 7.07 | 0.25 | 1.15        |
| C-TPT        | SCE    | 1.31 | 0.52 | 0.22 | 0.14 | 0.56 | 0.58 | 0.22 | 0.52 | 6.81 | 0.22 | 1.11        |
| O-TPT (Ours) | SCE    | 1.24 | 0.53 | 0.19 | 0.12 | 0.56 | 0.57 | 0.17 | 0.51 | 6.58 | 1.07 | <b>1.07</b> |

Table 1. Static Calibration Error (SCE) ( $10^{-2}$ ) performance comparison with CLIP-B/16 backbone.

| Method       | Metric | DTD  | FLW  | Food | SUN  | Air  | Pets | Calt | UCF  | SAT  | Car  | Avg         |
|--------------|--------|------|------|------|------|------|------|------|------|------|------|-------------|
| Zero Shot    | SCE    | 1.31 | 0.66 | 0.29 | 0.12 | 0.54 | 0.73 | 0.35 | 0.54 | 7.39 | 0.23 | 1.22        |
| TPT          | SCE    | 1.52 | 0.63 | 0.25 | 0.11 | 0.60 | 0.54 | 0.38 | 0.51 | 8.23 | 0.24 | 1.30        |
| C-TPT        | SCE    | 1.43 | 0.62 | 0.26 | 0.11 | 0.53 | 0.67 | 0.32 | 0.51 | 8.07 | 0.23 | 1.27        |
| O-TPT (Ours) | SCE    | 1.34 | 0.60 | 0.27 | 0.12 | 0.51 | 0.69 | 0.3  | 0.5  | 7.85 | 0.22 | <b>1.24</b> |

Table 2. Static Calibration Error (SCE) ( $10^{-2}$ ) performance comparison with CLIP-RN-50 backbone.

| Method       | Metric | DTD   | FLW   | Food  | SUN   | Air   | Pets  | Calt  | UCF   | SAT   | Car   | Avg         |
|--------------|--------|-------|-------|-------|-------|-------|-------|-------|-------|-------|-------|-------------|
| Zero Shot    | Acc.   | 38.4  | 64.5  | 81.4  | 62.4  | 22.7  | 86.2  | 88.1  | 67.6  | 34.6  | 66.5  | 61.24       |
|              | ECE    | 7.43  | 4.59  | 1.10  | 6.11  | 2.83  | 7.43  | 14.1  | 2.65  | 14.1  | 4.59  | 7.01        |
| TPT          | Acc.   | 45.5  | 67.9  | 84.9  | 65.9  | 24.5  | 87.4  | 91.5  | 66.4  | 43.3  | 67.2  | 64.45       |
|              | ECE    | 20.0  | 14.6  | 5.74  | 13.3  | 19.2  | 6.34  | 3.11  | 14.1  | 18.2  | 6.36  | 12.09       |
| C-TPT        | Acc.   | 46.3  | 69.6  | 84.1  | 65.5  | 24.7  | 88.8  | 91.7  | 67.0  | 43.0  | 66.9  | 64.76       |
|              | ECE    | 18.0  | 10.6  | 2.43  | 10.7  | 10.5  | 1.59  | 1.89  | 7.42  | 8.73  | 1.64  | 7.35        |
| O-TPT (Ours) | Acc.   | 44.62 | 68.29 | 84.82 | 63.05 | 23.16 | 88.28 | 91.48 | 64.74 | 44.81 | 66.02 | 63.92       |
|              | ECE    | 12.85 | 4.67  | 1.85  | 2.67  | 6.37  | 3.59  | 3.0   | 4.08  | 8.33  | 2.71  | <b>5.01</b> |

Table 3. Comparison of calibration performance with CLIP-B/16 backbone with the prompt of ‘a photo of the cool {class}’

| Method       | Metric | DTD   | FLW   | Food  | SUN   | Air   | Pets  | Calt  | UCF   | SAT   | Car   | Avg         |
|--------------|--------|-------|-------|-------|-------|-------|-------|-------|-------|-------|-------|-------------|
| Zero Shot    | Acc.   | 39.6  | 57.7  | 73.0  | 56.5  | 16.1  | 79.8  | 80.9  | 56.3  | 21.9  | 56.9  | 60.24       |
|              | ECE    | 6.94  | 5.14  | 1.49  | 3.33  | 6.42  | 3.30  | 4.79  | 3.76  | 13.9  | 4.83  | 5.39        |
| TPT          | Acc.   | 39.2  | 61.6  | 75.8  | 60.2  | 17.4  | 82.6  | 86.5  | 59.7  | 26.3  | 58.8  | 56.81       |
|              | ECE    | 24.8  | 17.0  | 7.93  | 11.4  | 17.5  | 7.31  | 6.02  | 14.4  | 15.7  | 4.49  | 12.65       |
| C-TPT        | Acc.   | 39.1  | 67.0  | 76.0  | 60.3  | 17.4  | 83.5  | 87.1  | 59.6  | 26.1  | 57.2  | 57.33       |
|              | ECE    | 18.0  | 6.34  | 3.70  | 8.28  | 13.5  | 1.75  | 2.85  | 8.82  | 11.2  | 1.65  | 7.61        |
| O-TPT (Ours) | Acc.   | 40.54 | 65.49 | 75.51 | 58.98 | 15.99 | 83.78 | 86.98 | 58.79 | 26.89 | 56.77 | 56.97       |
|              | ECE    | 12.42 | 3.03  | 1.32  | 3.35  | 8.36  | 4.47  | 3.53  | 3.27  | 7.21  | 2.74  | <b>4.97</b> |

Table 4. Comparison of calibration performance with CLIP-RN-50 backbone with the prompt of ‘a photo of the cool {class}’

‘an example of {class}’, across CLIP-B/16 and CLIP RN-50 backbones. Tables 3 and 4 summarize the performance of O-TPT with the prompt ‘a photo of the cool {class}’ and

5 context token tuning. For CLIP-B/16, O-TPT achieves an overall reduced calibration error of **5.01**, compared to 7.35 for C-TPT, while for RN-50, it achieves **4.97**, com-

| Method       | Metric | DTD   | FLW   | Food  | SUN  | Air   | Pets  | Calt  | UCF  | SAT    | Car   | Avg         |
|--------------|--------|-------|-------|-------|------|-------|-------|-------|------|--------|-------|-------------|
| Zero Shot    | Acc.   | 42.4  | 64.7  | 83.9  | 61.4 | 22.3  | 82.5  | 90.9  | 64.8 | 38.8   | 64.6  | 61.63       |
|              | ECE    | 4.94  | 4.70  | 2.78  | 3.33 | 7.09  | 2.91  | 7.51  | 2.79 | 13.4   | 2.49  | 5.64        |
| TPT          | Acc.   | 45.8  | 69.4  | 84.8  | 65.3 | 22.9  | 83.0  | 93.0  | 67.1 | 40.7   | 67.3  | 63.93       |
|              | ECE    | 20.5  | 12.2  | 5.05  | 7.94 | 16.2  | 7.30  | 2.91  | 11.6 | 20.8   | 6.26  | 11.07       |
| C-TPT        | Acc    | 45.4  | 71.5  | 84.3  | 66.0 | 23.6  | 86.9  | 93.8  | 66.4 | 51.5   | 66.6  | 65.6        |
|              | ECE    | 15.5  | 4.49  | 1.36  | 3.54 | 9.05  | 2.89  | 1.62  | 3.87 | 5.18   | 1.75  | 4.93        |
| O-TPT (Ours) | Acc.   | 45.45 | 70.32 | 84.79 | 64.5 | 22.77 | 87.76 | 93.35 | 65.4 | 51.011 | 66.25 | 65.16       |
|              | ECE    | 11.79 | 3.22  | 2.92  | 4.62 | 7.92  | 3.29  | 3.24  | 2.63 | 5.08   | 1.92  | <b>4.66</b> |

Table 5. Comparison of calibration performance with CLIP-B/16 backbone with the prompt of ‘an example of {class}’

| Method       | Metric | DTD   | FLW   | Food  | SUN   | Air   | Pets  | Calt  | UCF   | SAT   | Car    | Avg         |
|--------------|--------|-------|-------|-------|-------|-------|-------|-------|-------|-------|--------|-------------|
| Zero Shot    | Acc.   | 41.10 | 58.10 | 75.20 | 56.20 | 16.10 | 75.70 | 80.30 | 56.30 | 25.5  | 55.8   | 48.45       |
|              | ECE    | 5.20  | 3.04  | 3.31  | 3.68  | 4.80  | 2.52  | 7.91  | 3.76  | 9.43  | 4.80   | 4.845       |
| TPT          | Acc.   | 41.2  | 62.7  | 76.1  | 60.7  | 17.9  | 77.2  | 87.1  | 57.7  | 29.4  | 57.7   | 56.77       |
|              | ECE    | 20.2  | 12.2  | 4.83  | 8.19  | 15.2  | 6.98  | 5.12  | 15.3  | 11.1  | 5.52   | 10.46       |
| C-TPT        | Acc    | 41.2  | 65.4  | 75.8  | 61.4  | 17.6  | 78.0  | 88.4  | 58.4  | 30.4  | 57.1   | 57.37       |
|              | ECE    | 15.6  | 2.97  | 1.90  | 4.84  | 7.16  | 2.72  | 2.89  | 6.99  | 7.69  | 2.05   | 5.48        |
| O-TPT (Ours) | Acc.   | 41.19 | 65.49 | 75.62 | 60.97 | 16.71 | 77.79 | 88.36 | 57.94 | 33.32 | 56.733 | 57.412      |
|              | ECE    | 13.59 | 2.49  | 1.47  | 3.38  | 6.6   | 2.55  | 2.56  | 6.2   | 5.07  | 2.69   | <b>4.66</b> |

Table 6. Comparison of calibration performance with CLIP- RN-50 backbone with the prompt of ‘an example of {class}’

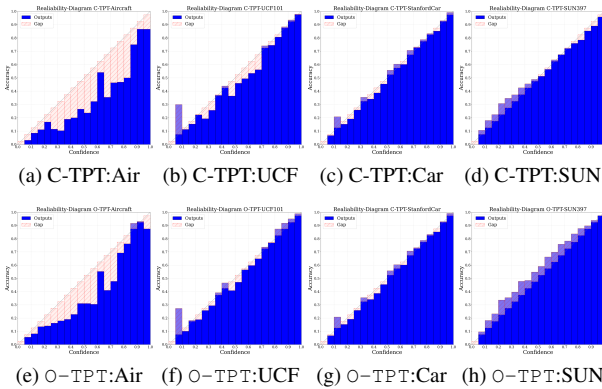

Figure 3. Reliability diagrams for CLIP RN-50.

pared to 7.61 for C-TPT. Similarly, Tables 5 and 6 present the results for the prompt ‘an example of {class}’ and 4 context token tuning. Here, O-TPT again outperforms C-TPT, achieving a reduced calibration error of **4.66** (CLIP-B/16) compared to 4.93, and **4.66** (CLIP RN-50) compared to 5.48. These results consistently demonstrate that O-TPT effectively reduces calibration errors across various prompt initializations, showcasing its robustness and adaptability in

diverse settings.

## A5. Calibration with a Combination of C-TPT and O-TPT

Tab. 7 shows that O-TPT + C-TPT can outcompete O-TPT in calibration performance, thereby revealing the generalizability of O-TPT over a stronger baseline.

| Method        | Metric | DTD         | FLW         | UCF         |
|---------------|--------|-------------|-------------|-------------|
| O-TPT         | ACC    | 45.68       | 70.07       | 64.16       |
|               | ECE    | 7.88        | 3.87        | 2.34        |
| O-TPT + C-TPT | ACC    | 45.2        | 70.6        | 64.1        |
|               | ECE    | <b>7.06</b> | <b>3.41</b> | <b>2.14</b> |

Table 7. O-TPT + C-TPT on DTD,FLW and UCF.

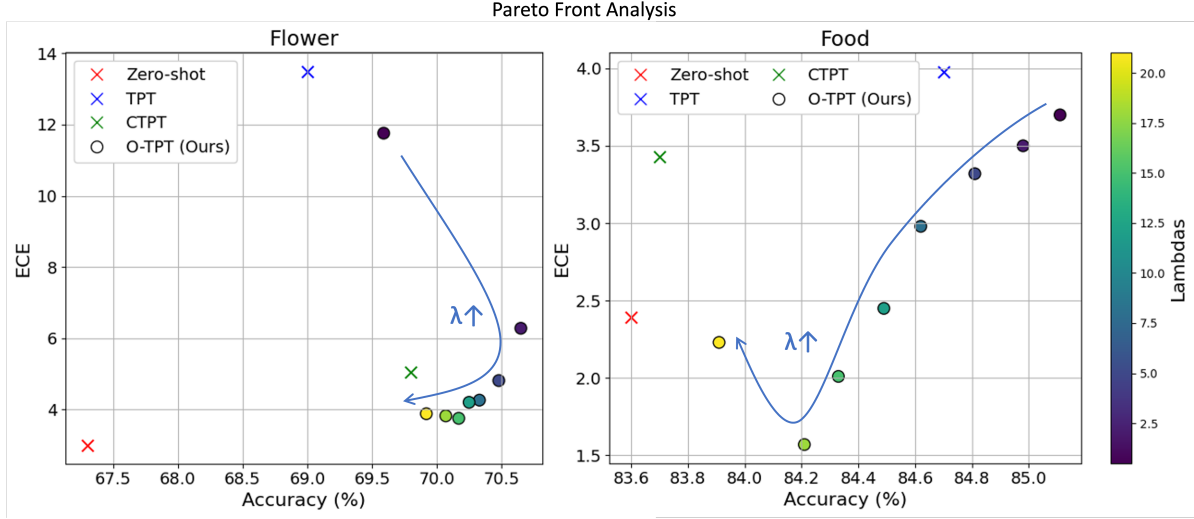

Figure 4. Pareto front analysis

| Method | Metric | Covid(BA)   | Covid(CA)   |
|--------|--------|-------------|-------------|
| BAPLe  | ACC    | 99.90       | 82.5        |
|        | ECE    | 3.21        | 15.64       |
| BAPLe+ | ACC    | 99.62       | 81.36       |
| O-TPT  | ECE    | <b>0.91</b> | <b>5.97</b> |

Table 8. MedCLIP: BAPLe + O-TPT on Covid dataset.

| Method | Metric | ISIC'18       |
|--------|--------|---------------|
| FPT    | ACC    | 98.43         |
|        | ECE    | 0.2328        |
| FPT+   | ACC    | 98.25         |
| O-TPT  | ECE    | <b>0.1381</b> |

Table 9. FPT+O-TPT on ISIC2018.

| Method | Metric | KC           |
|--------|--------|--------------|
| PS     | ACC    | 76.6         |
|        | ECE    | 15.54        |
| PS+    | ACC    | 76.2         |
| O-TPT  | ECE    | <b>12.73</b> |

Table 10. PLIP: Prompts smooth (PS)+O-TPT on KatherColon (KC).

## A6. O-TPT results on Medical Prompt tuning methods

In Tab.9, we evaluate FPT[2] and FPT+O-TPT on ISIC2018, showing encouraging ECE reduction while maintaining accuracy. Tab.10 provides comparison using PLIP with Prompt Smooth (PS)[3], where PS+O-TPT improves calibration. Similarly, Tab.8 provides comparison using MedCLIP with BAPLe[1] where BAPLe+O-TPT improves calibration.

## A7. Pareto Front analysis with varying lamdas

Fig. 4 shows the Pareto front analysis on Food and Flower datasets, highlighting the accuracy-ECE tradeoff with varying  $\lambda$ s. Our method achieves a better balance than TPT and C-TPT across most  $\lambda$  values in two datasets.

## References

- [1] Asif Hanif, Fahad Shamshad, Muhammad Awais, Muzammal Naseer, Fahad Shahbaz Khan, Karthik Nandakumar, Salman Khan, and Rao Muhammad Anwer. Baple: Backdoor attacks on medical foundational models using prompt learning, 2024. 4
- [2] Yijin Huang, Pujin Cheng, Roger Tam, and Xiaoying Tang. Fine-grained prompt tuning: A parameter and memory efficient transfer learning method for high-resolution medical image classification, 2024. 4
- [3] Noor Hussein, Fahad Shamshad, Muzammal Naseer, and Karthik Nandakumar. Prompts smooth: Certifying robustness of medical vision-language models via prompt learning, 2024. 4
- [4] Alec Radford, Jong Wook Kim, Chris Hallacy, Aditya Ramesh, Gabriel Goh, Sandhini Agarwal, Girish Sastry,

Amanda Asbell, Pamela Mishkin, Jack Clark, et al. Learning transferable visual models from natural language supervision. In *International conference on machine learning*, pages 8748–8763. PMLR, 2021. [1](#)

- [5] Hee Suk Yoon, Eunseop Yoon, Joshua Tian Jin Tee, Mark Hasegawa-Johnson, Yingzhen Li, and Chang D Yoo. C-tp: Calibrated test-time prompt tuning for vision-language models via text feature dispersion. *International conference on machine learning*, 2024. [1](#)
